# Supplementary material for: Sumoylation of Kif18A plays a role in regulating mitotic progression
Source: PubMed Central journal article supplement (PMC4389313; doi:10.1186/s12885-015-1226-9), 2015-03-28

## Additional file 2

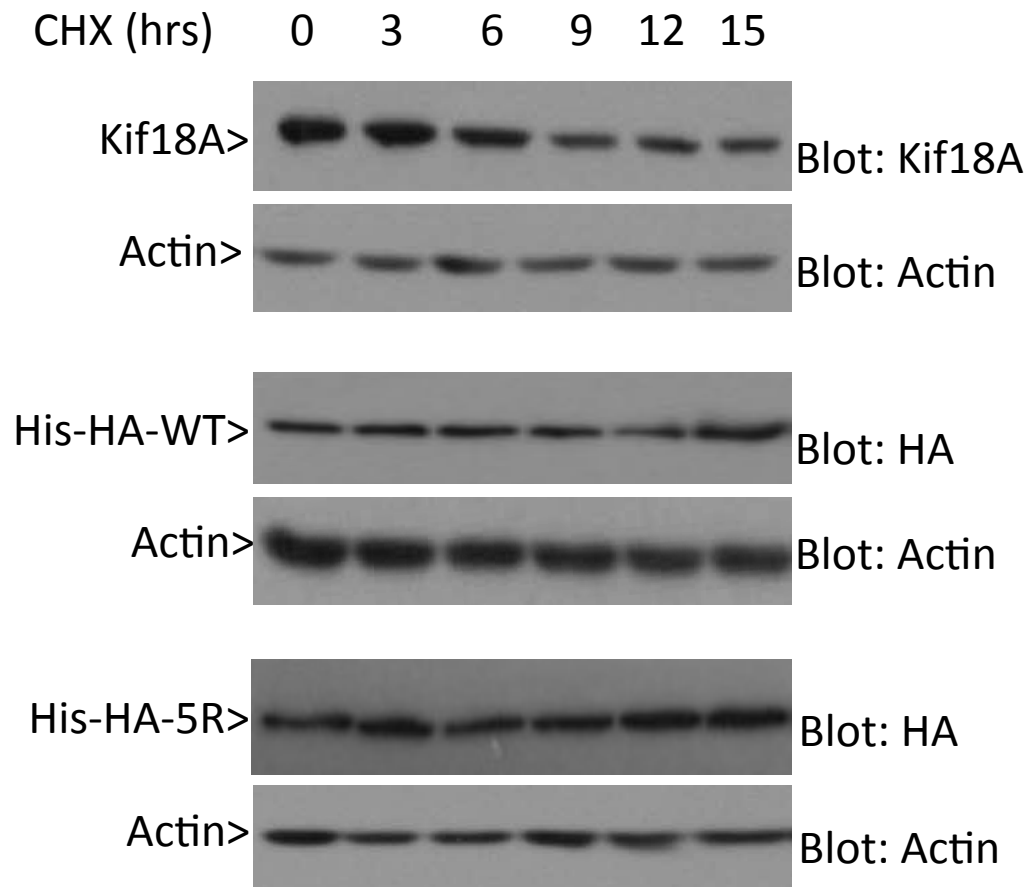

Supplement: 12885_2015_1226_MOESM2_ESM.pdf [file 12885_2015_1226_MOESM2_ESM.pdf]
